# Supplementary material for: Nitroimidazolic radiosensitizers investigated by electrospray ionization time-of-flight mass spectrometry and density functional theory
Source: Royal Society of Chemistry journal article supplement (doi:10.1039/c7ra08312b), 2017-01-01
Supplement: c7ra08312b1.pdf [file c7ra08312b1.pdf]

## Electronic Supplementary Information

### Nitroimidazolic radiosensitizers investigated by electrospray ionization

#### time-of-flight mass spectrometry and density functional theory

S. Pandeti<sup>a,b,c</sup>, L. Feketeová<sup>a,d,e\*</sup>, T. J. Reddy<sup>c</sup>, H. Abdoul-Carime<sup>a</sup>, B. Farizon<sup>a</sup>, M. Farizon<sup>a</sup>, and  
T. D. Märk<sup>d</sup>

<sup>a</sup>*Université de Lyon; Université Claude Bernard Lyon1; Institut de Physique Nucléaire de Lyon, CNRS/IN2P3 UMR 5822, 69622 Villeurbanne Cedex, France.*

<sup>b</sup>*Medicinal and Process Chemistry Division, CSIR-Central Drug Research Institute, Lucknow-226 031, India.*

<sup>c</sup>*Analytical Chemistry and Mass Spectrometry Division, CSIR-Indian Institute of Chemical Technology, Hyderabad-500 007, India.*

<sup>d</sup>*Institut für Ionenphysik und Angewandte Physik, Leopold Franzens Universität Innsbruck, Technikerstrasse 25, 6020 Innsbruck, Austria.*

<sup>e</sup>*Center for Molecular Biosciences Innsbruck (CMBI), Leopold Franzens Universität Innsbruck, Technikerstrasse 25, 6020 Innsbruck, Austria.*

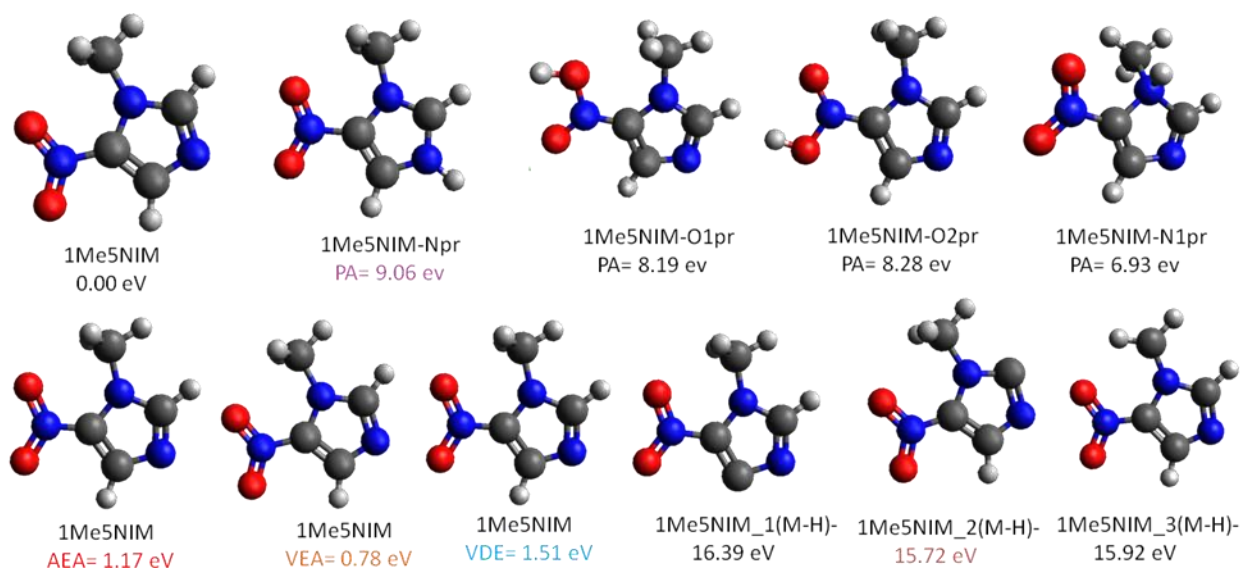

**Figure S1.** M062x/6-311+G(d,p) calculated minimum energy structure of 1-methyl-5-nitroimidazole, Proton affinity (PA), Adiabatic electron affinity (AEA), Vertical electron affinity (VEA) and Vertical detachment energy (VDE) of the corresponding neutral 1-methyl-5-nitroimidazole, their energies in eV.

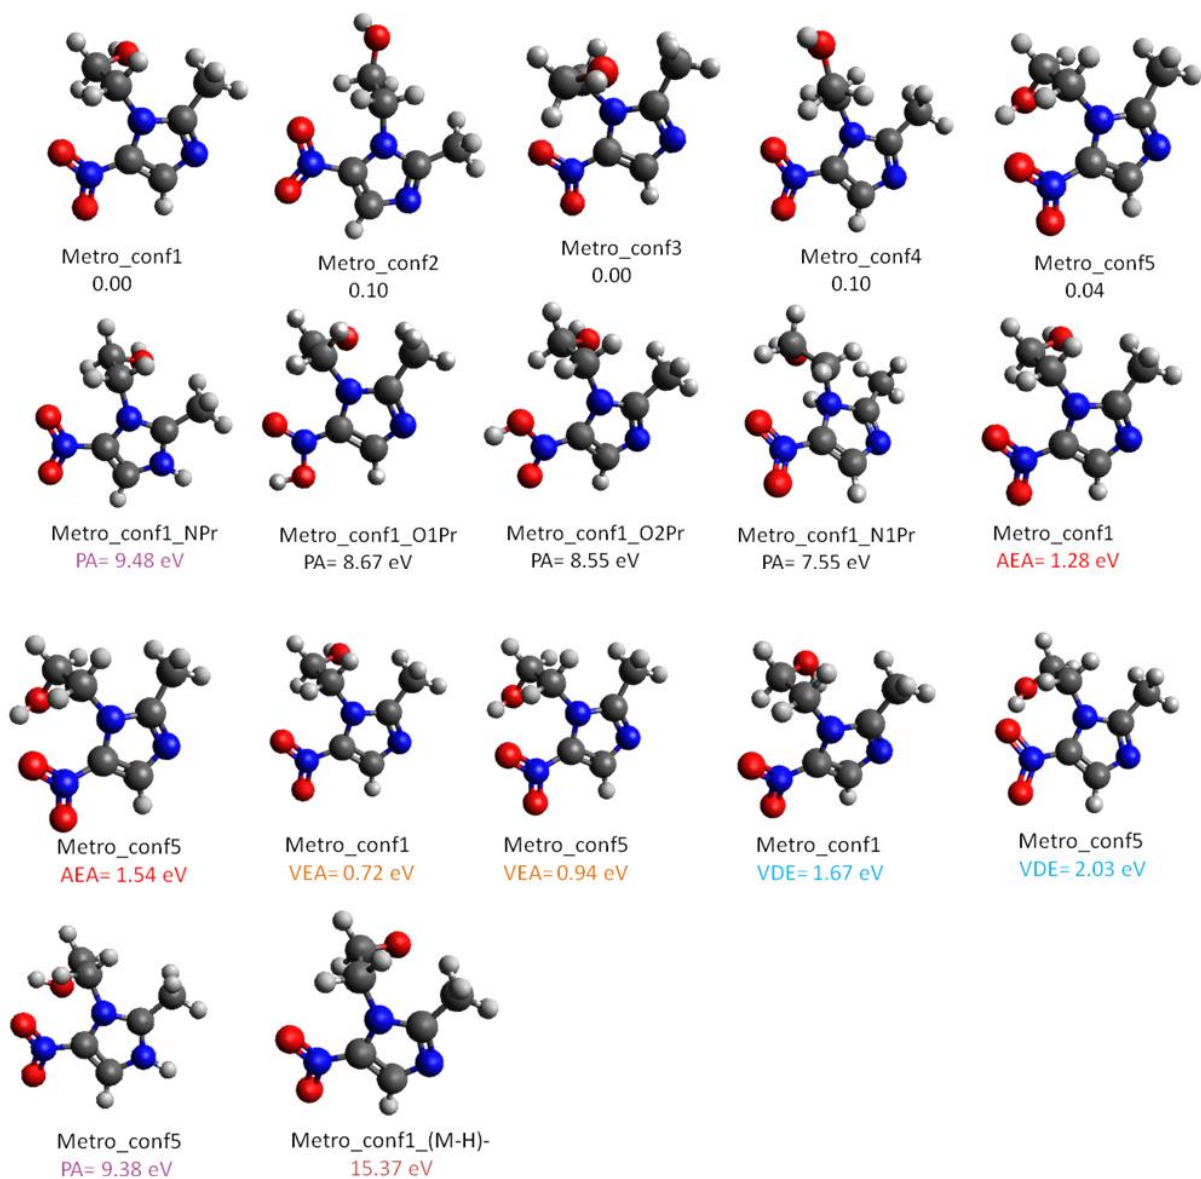

**Figure S2.** M062x/6-311+G(d,p) calculated minimum energy structures for the tautomer of Metronidazole neutral, Proton affinity (PA), Adiabatic electron affinity (AEA), Vertical electron affinity (VEA) and Vertical detachment energy (VDE) of the corresponding neutral Metronidazole.

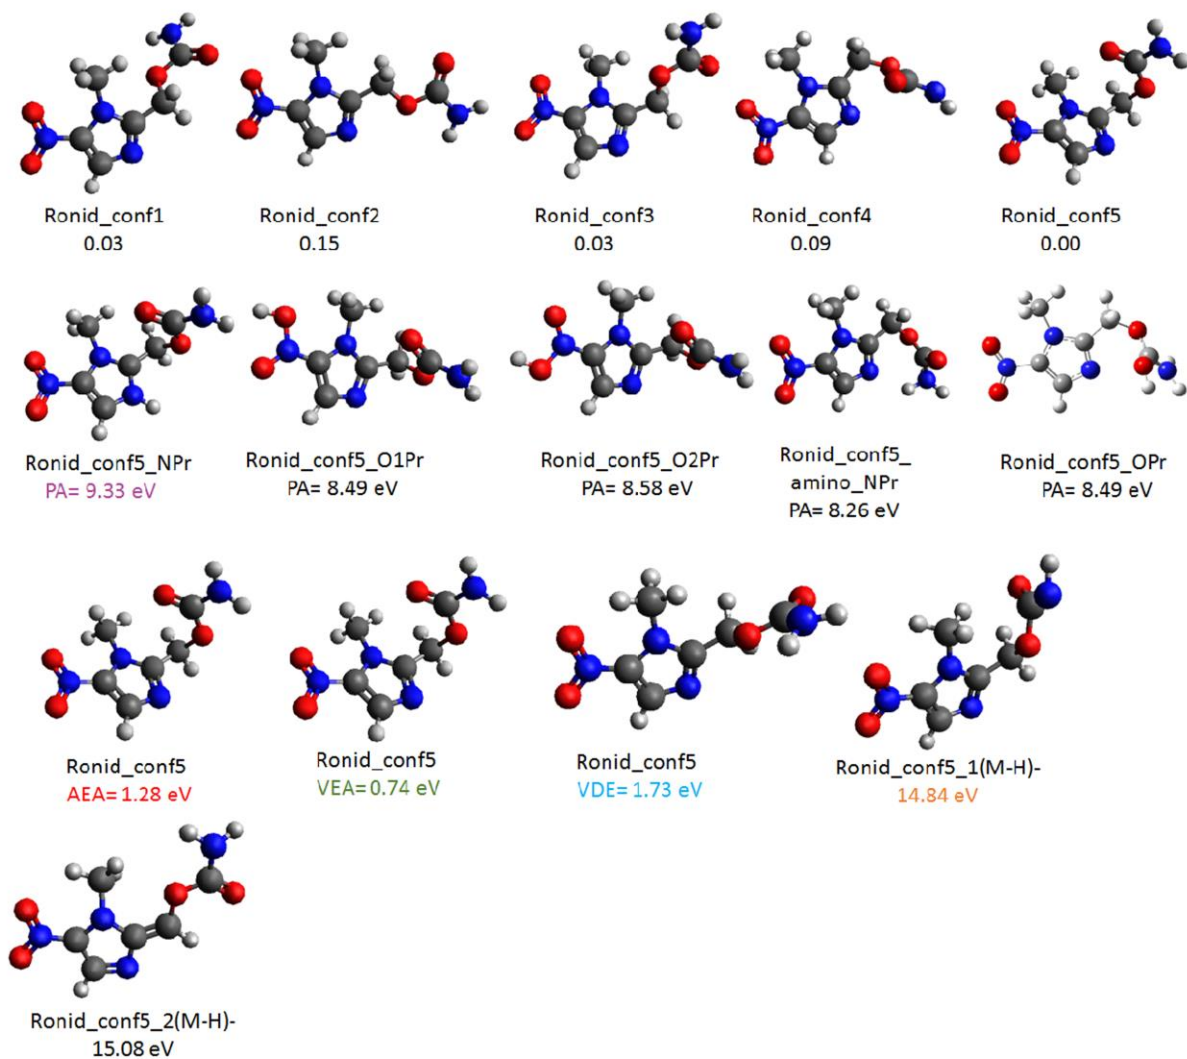

**Figure S3.** M062x/6-311+G(d,p) calculated minimum energy structures for the tautomer of Ronidazole neutral, Proton affinity (PA), Adiabatic electron affinity (AEA), Vertical electron affinity (VEA) and Vertical detachment energy (VDE) of the corresponding neutral Metronidazole.

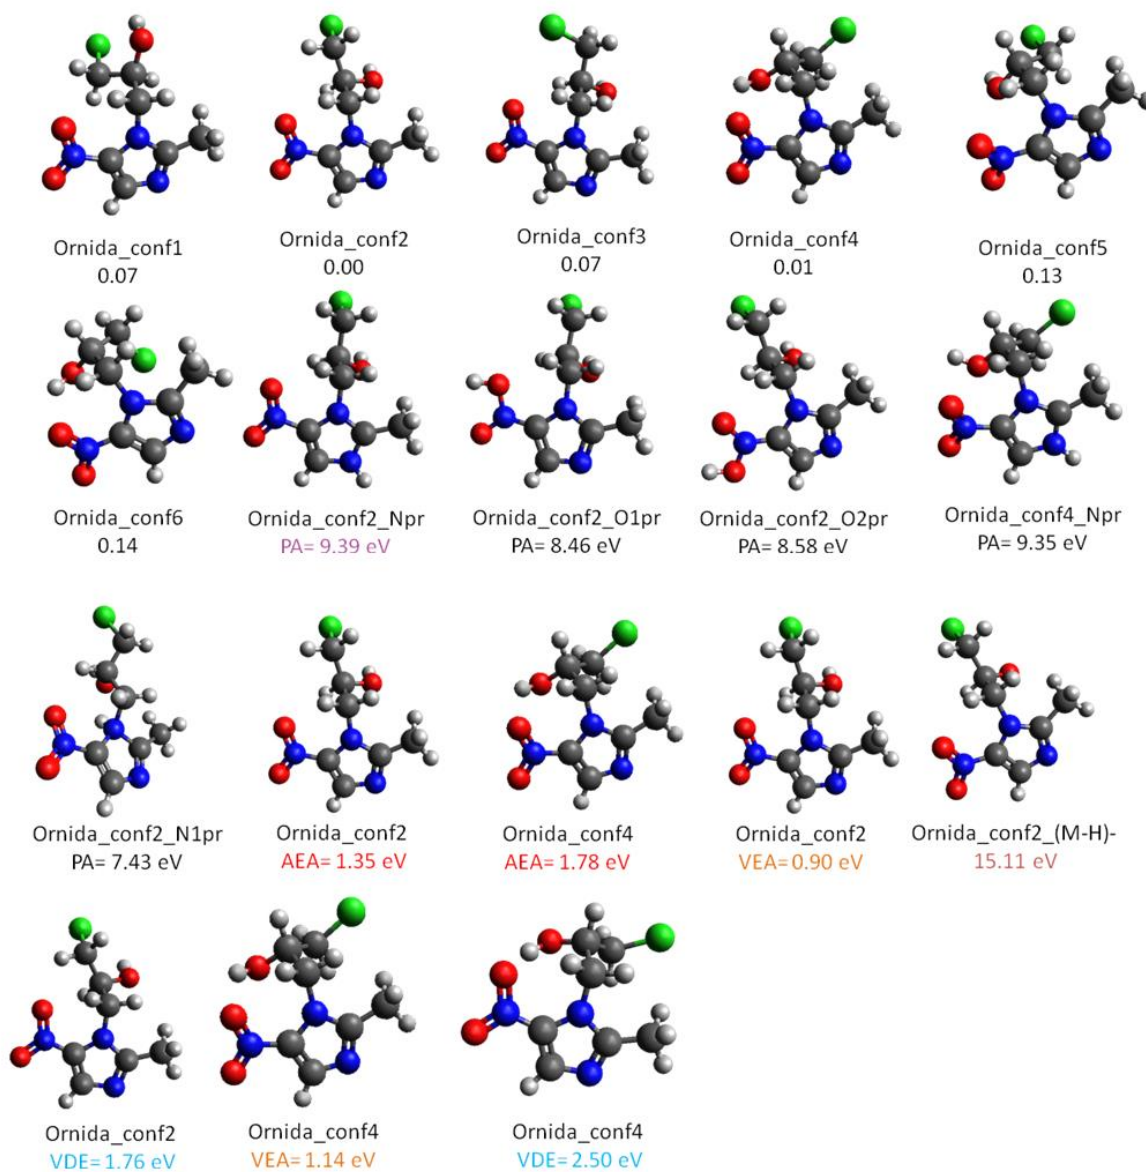

**Figure S4.** M062x/6-311+G(d,p) calculated minimum energy structures for the tautomer of Ornidazole neutral, Proton affinity (PA), Adiabatic electron affinity (AEA), Vertical electron affinity (VEA) and Vertical detachment energy (VDE) of the corresponding neutral Metronidazole.

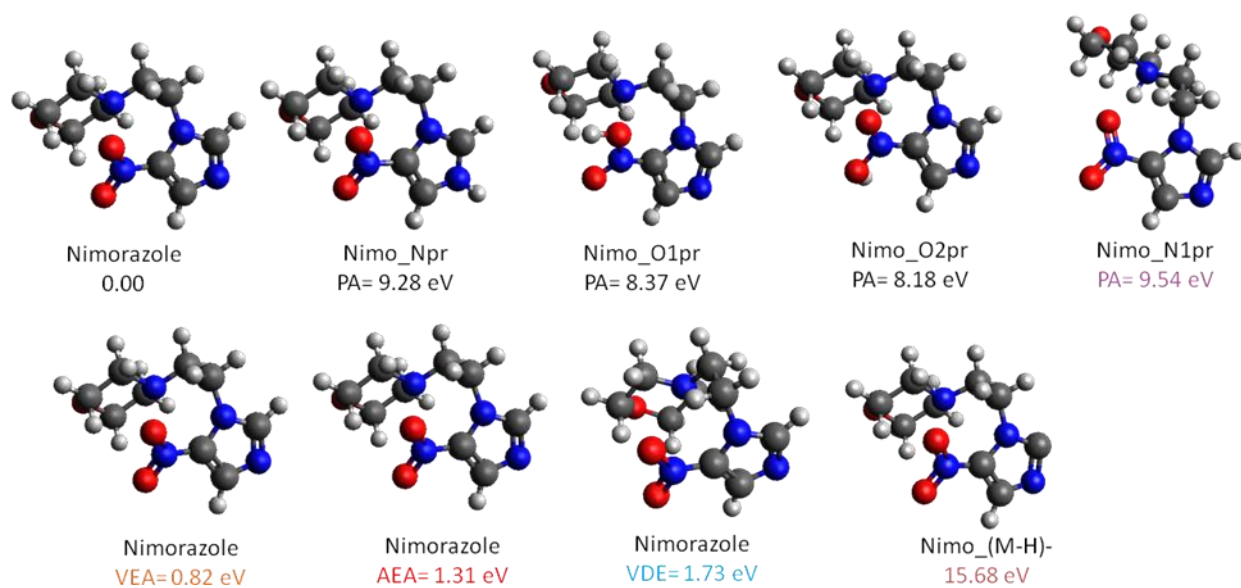

**Figure S5.** M062x/6-311+G(d,p) calculated minimum energy structure of Nimorazole neutral, Proton affinity (PA), Adiabatic electron affinity (AEA), Vertical electron affinity (VEA) and Vertical detachment energy (VDE) of the corresponding neutral Nimorazole.

|                              | Positive ion mode | Negative ion mode |
|------------------------------|-------------------|-------------------|
| Capillary (kV)               | 2.98              | -3.41             |
| Cone (V)                     | 34                | -54               |
| Extractor (V)                | 22                | -41               |
| RF Lens (V)                  | 3.05              | -5.25             |
| Source Temperature (°C)      | 88                | 89                |
| Desolvation Temperature (°C) | 148               | 151               |
| Collision                    | 4                 | -5.3              |
| Ion energy                   | 2                 | 2                 |
| Steering                     | -1.09             | 2.03              |
| Entrance                     | -69               | 69.3              |
| Prefilter                    | -2.8              | -0.4              |

**Table S1.** Details of the positive and negative ion mode ESI source and MS settings.
